# Supplementary material
Source: PubMed Central journal article supplement (PMC7600058)
Supplement: jamaoncol-e206252-s001.pdf [file jamaoncol-e206252-s001.pdf]

## Supplementary Online Content

Samadder NJ, Riegert-Johnson D, Boardman L, et al. Comparison of universal genetic testing vs guideline-directed targeted testing for patients with hereditary cancer syndrome. *JAMA Oncol*. Published online October 30, 2020. doi:10.1001/jamaoncol.2020.6252

**eAppendix 1.** Invitae Multigene Panel List by Penetrance Category

**eAppendix 2.** Methods for Sequencing and Determination of Pathogenicity of Variants

**eFigure 1.** Patient Flow Diagram

**eFigure 2.** Germline Mutation Type Shown by Tumor Type

**eTable 1.** Participant Characteristics by Clinical Site

**eTable 2.** Participant and Tumor Characteristics by Genetic Test Result

**eTable 3.** Incidence of Findings Not Predicted by Clinical Guidelines (Incremental Findings)

**eTable 4.** Participant and Tumor Characteristics by Incremental Vs Nonincremental PGM

**eTable 5.** Clinical Implications of Those With High Penetrance PGM

**eTable 6.** Characteristics of Participants Whose Families Did or Did Not Undergo Cascade Family Variant Testing

**eTable 7.** Logistic Regression ORs and 95% CI of Patient and Tumor Predictors of Pathogenic/Likely Pathogenic Mutation

### eReferences

This supplementary material has been provided by the authors to give readers additional information about their work.

**Appendix 1: Invitae Multi-gene panel list by penetrance category**

|                                                                                                                                                                                                                                                                                                                                                                                                                     |                                                                                                                                                                                                                                                                           |
|---------------------------------------------------------------------------------------------------------------------------------------------------------------------------------------------------------------------------------------------------------------------------------------------------------------------------------------------------------------------------------------------------------------------|---------------------------------------------------------------------------------------------------------------------------------------------------------------------------------------------------------------------------------------------------------------------------|
| <p style="text-align: center;"><b>High Penetrance</b></p> <p><i>ALK, APC, AXIN2, BAP1, BMPR1A, BRCA1, BRCA2, CDH1, CDK4, CDKN1C, CDKN2A, DICER1, EPCAM, FH (biallelic), FLCN, GATA2, HRAS, MEN1, MET, MLH1, MSH2, MSH6, MUTYH (biallelic), NF2, PALB2, PHOX2B, PMS2, PTCH1, PTEN, RB1, RET, RUNX1, SDHA, SDHB, SDHD, SDHC, SMAD4, SMARCA4, SMARCB1, SMARCE1, STK11, SUFU, TERC, TERT, TP53, TSC1, TSC2, VHL</i></p> | <p style="text-align: center;"><b>Moderate Penetrance</b></p> <p><i>AIP, ATM, BLM (biallelic), BRIP1, CASR, CDC73, CDKN1B, CEBPA, CHEK2, GREM1, HOXB13, MAX, MITF, NBN, NF1, POLD1, POLE, POT1, PRKAR1A, RAD51C, RAD51D, RECQL4 (biallelic), SDHAF2, TMEM127, WT1</i></p> |
| <p style="text-align: center;"><b>Low Penetrance</b></p> <p><i>APC (I1307K), BARD1, CTNNA1, EGFR, KIT, MUTYH (monoallelic), PDGFRA, RAD50</i></p>                                                                                                                                                                                                                                                                   | <p style="text-align: center;"><b>Recessive Conditions</b></p> <p><i>BLM (monoallelic), DIS3L2, FH, MSH3, NTHL1, RECQL4, WRN</i></p> <p style="text-align: center;"><b>X-linked Conditions</b></p> <p style="text-align: center;"><i>GPC3</i></p>                         |

## Appendix 2: Methods for Sequencing and determination of pathogenicity of variants

Patients in the study underwent clinical genetic testing at Invitae, a CLIA-certified, NYS-certified and CAP-accredited genetic diagnostics laboratory. Cancer genetic testing at Invitae comprehensively analyzes patients via full-gene sequencing (including coding exons, 10-20 base pairs of adjacent intronic sequencing on either side of the coding exons and select non-coding variants) and deletion-duplication analysis for SNVs, indels, CNVs, and splice site variants. Based on validation study results, this assay achieves >99% analytical sensitivity and specificity for single nucleotide variants, insertions and deletions <15bp in length, and exon-level deletions and duplications. Invitae's methods also detect insertions and deletions larger than 15bp but smaller than a full exon but sensitivity for these may be marginally reduced. Invitae's deletion/duplication analysis determines copy number at a single exon resolution at virtually all targeted exons.

Genomic DNA was extracted from whole blood using a QiaSymphony (Qiagen, Hilden, Germany). Next-generation sequencing and quality control were performed on an Illumina platform as previously described.<sup>1,2</sup> Reads were aligned to the reference human genome sequence GRCh37 using Novoalign (Novocraft Technologies, Selangor, Malaysia). Small indels and single-nucleotide variants (SNVs) were analyzed using the Genome Analysis Toolkit (GATK). Copy number variant calls were performed using CNVkit.<sup>3</sup> Large structural variants were detected using split-read analysis as described previously.<sup>4</sup>

Pathogenicity of candidate variants, including structural variants, was established and they were classified as pathogenic or likely pathogenic if they involved large genomic events or conferred a truncating, initiation codon or splice donor/acceptor effect, if functional data showed an impact on protein function, or if pathogenicity was otherwise reported in published literature.<sup>5</sup> Validation of PGMs observed was performed in accordance with Invitae standard operating practices, wherein orthogonal technology was used to validate pathogenic and likely pathogenic variants via Sanger sequencing or Multiplex Ligation-Dependent Probe Amplification.<sup>6</sup> Confirmed variants were then interrogated using a refinement of American College of Medical Genetics and Genomics (ACMG) criteria (Sherloc).<sup>7</sup>

Genes in which PGMs were identified were organized into high, intermediate and low penetrance categories based on the relative risk (RR) of cancer associated with PGMs in each gene, based on evidence in the literature. Examples include high penetrance genes such as *BRCA1* & *BRCA2*, RR 5-9<sup>8</sup>, moderate penetrance genes such as *CHEK2*, RR 3.3<sup>9</sup>, low penetrance genes such as *BARD1*, RR <2<sup>10</sup>, and recessive genes such as *WRN*.<sup>11</sup> In some cases specific PGMs (e.g. those occurring more frequently in certain populations) were classified individually based on the RR of cancer that has been established for these particular variants, an example of which is *APC* I1307K, RR ~2 in the Ashkenazi Jewish population.<sup>12</sup>

**Supplemental Figure 1: Patient flow Diagram**

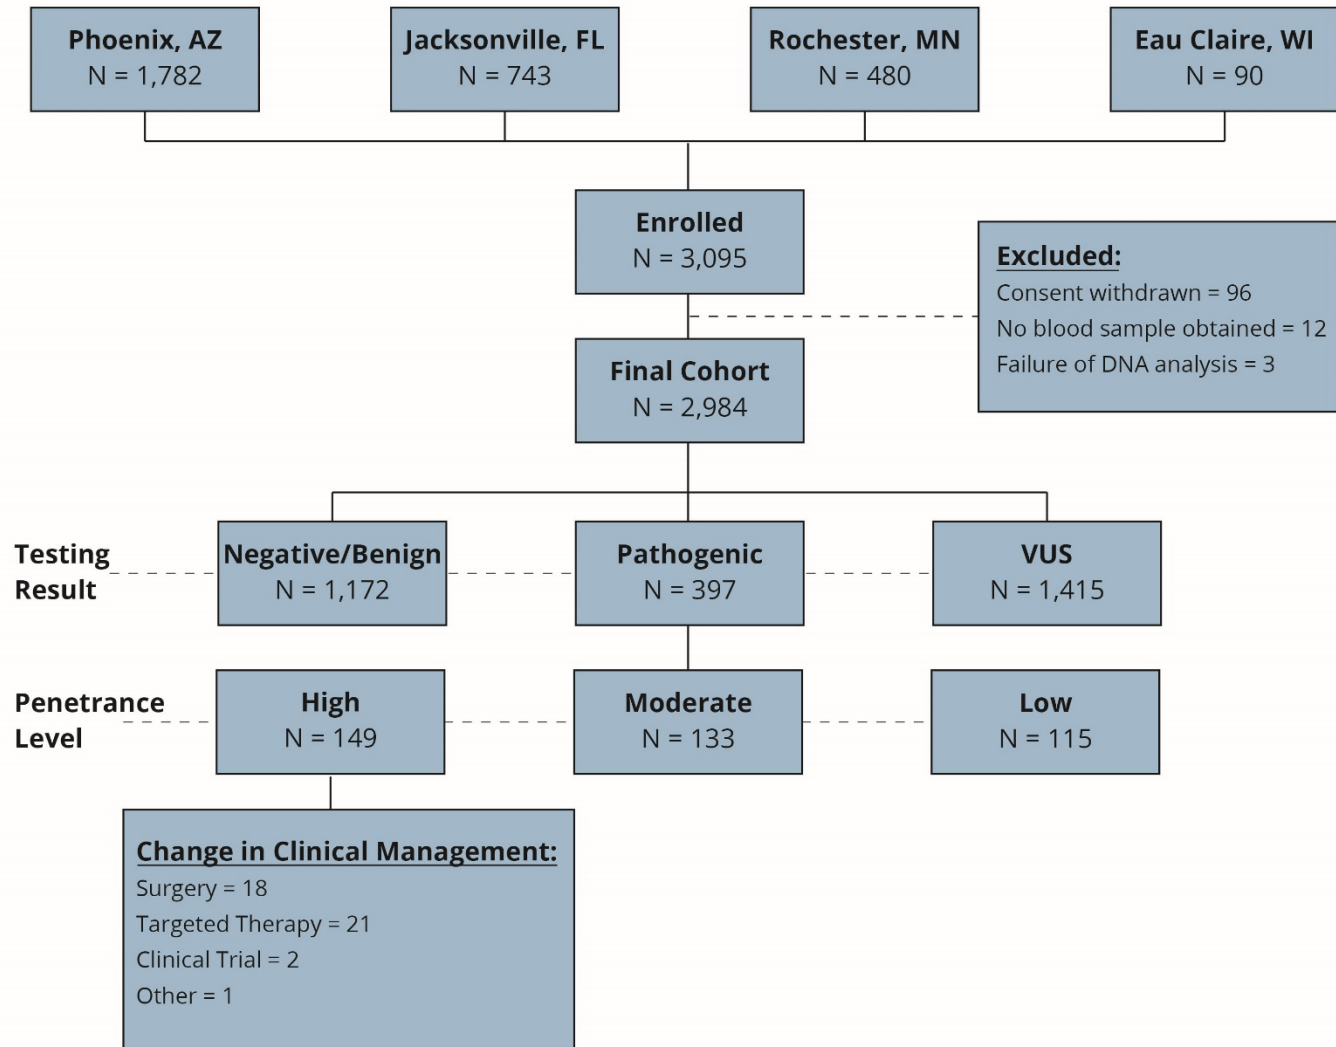

Supplemental Figure 2: Germline mutation type shown by tumor type

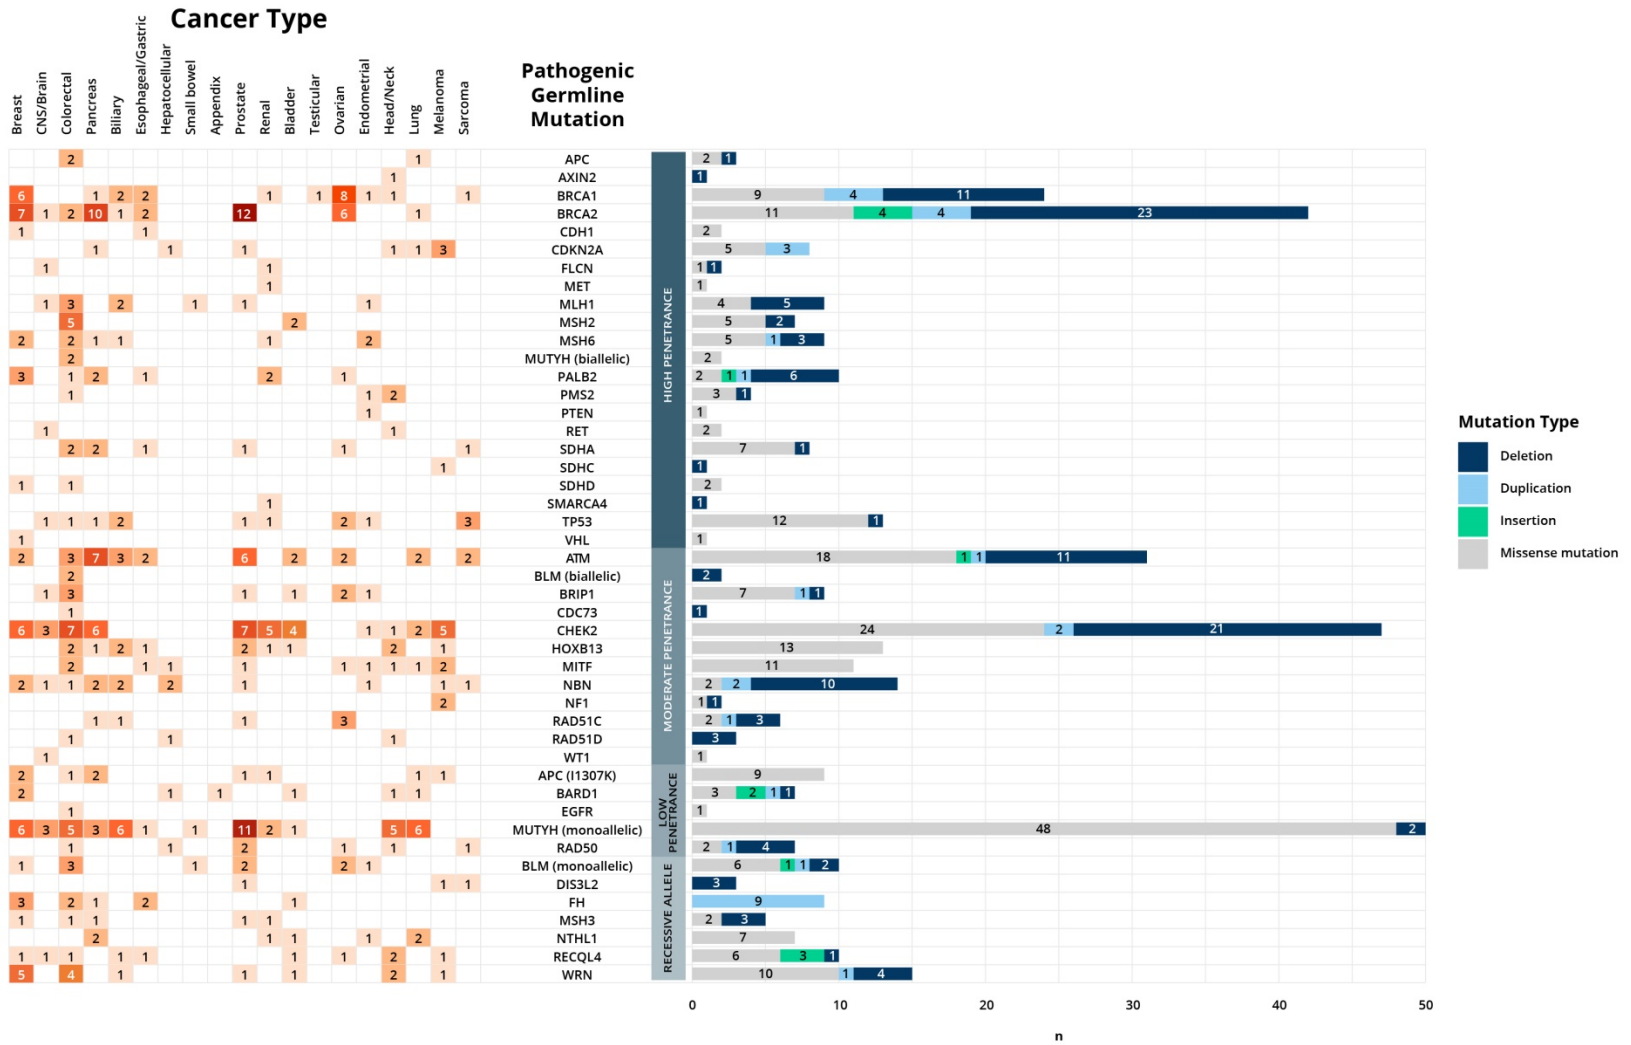

**eTable 1: Participant characteristics by clinical site**

|                                  | Arizona         | Florida        | Rochester      | Eau Claire     | Total           | p value              |
|----------------------------------|-----------------|----------------|----------------|----------------|-----------------|----------------------|
| All                              | 1697            | 730            | 467            | 90             | 2984            | < 0.001 <sup>1</sup> |
| Gender                           |                 |                |                |                |                 | < 0.001 <sup>2</sup> |
| Male                             | 983<br>(57.9%)  | 365<br>(50.0%) | 200<br>(42.8%) | 34<br>(37.8%)  | 1582<br>(53.0%) |                      |
| Female                           | 714<br>(42.1%)  | 365<br>(50.0%) | 267<br>(57.2%) | 56<br>(62.2%)  | 1402<br>(47.0%) |                      |
| Age                              |                 |                |                |                |                 | < 0.001 <sup>3</sup> |
| Mean (SD)                        | 61.7<br>(12.6)  | 61.9<br>(11.3) | 59.1<br>(12.3) | 64.5<br>(10.3) | 61.4 (12.2)     |                      |
| Median                           | 64.0            | 63.0           | 61.0           | 66.5           | 64.0            |                      |
| Range                            | 18.0 -<br>85.0  | 20.0 -<br>81.0 | 27.0 - 79.0    | 31.0 -<br>80.0 | 18.0 - 85.0     |                      |
| Ancestry                         |                 |                |                |                |                 | < 0.001 <sup>2</sup> |
| White                            | 1429<br>(84.2%) | 608<br>(83.3%) | 445<br>(95.3%) | 89<br>(98.9%)  | 2571<br>(86.2%) |                      |
| Non-white                        | 268<br>(15.8%)  | 122<br>(16.7%) | 22 (4.7%)      | 1 (1.1%)       | 413 (13.8%)     |                      |
| Hispanic/Latino                  | 127<br>(7.5%)   | 28<br>(3.8%)   | 4 (0.9%)       | 0 (0.0%)       | 159 (5.3%)      |                      |
| Black/African American           | 35<br>(2.1%)    | 69<br>(9.5%)   | 6 (1.3%)       | 0 (0.0%)       | 110 (3.7%)      |                      |
| Asian                            | 39<br>(2.3%)    | 10<br>(1.4%)   | 4 (0.9%)       | 0 (0.0%)       | 53 (1.8%)       |                      |
| American Indian/ Alaskan Native  | 27<br>(1.6%)    | 1 (0.1%)       | 1 (0.2%)       | 0 (0.0%)       | 29 (1.0%)       |                      |
| Native Hawaiian/Pacific Islander | 5 (0.3%)        | 1 (0.1%)       | 0 (0.0%)       | 0 (0.0%)       | 6 (0.2%)        |                      |
| Other                            | 35<br>(2.1%)    | 13<br>(1.8%)   | 7 (1.5%)       | 1 (1.1%)       | 56 (1.9%)       |                      |
| Stage <sup>4</sup>               |                 |                |                |                |                 | < 0.001 <sup>1</sup> |
| 0/1                              | 273<br>(16.8%)  | 147<br>(20.6%) | 92<br>(21.0%)  | 23<br>(25.5%)  | 535 (18.6%)     |                      |
| 2                                | 248<br>(15.3%)  | 152<br>(21.4%) | 68<br>(15.5%)  | 9<br>(10.0%)   | 477 (16.7%)     |                      |
| 3                                | 310<br>(19.1%)  | 153<br>(21.5%) | 116<br>(26.5%) | 14<br>(15.6%)  | 593 (20.7%)     |                      |
| 4                                | 792<br>(48.8%)  | 259<br>(36.4%) | 162<br>(37.0%) | 44<br>(48.9%)  | 1257<br>(43.9%) |                      |
| Missing                          | 3               | 0              | 0              | 0              | 3               |                      |
| WHO Grade <sup>5</sup>           |                 |                |                |                |                 | 0.325 <sup>1</sup>   |
| 1                                | 1 (1.4%)        | 1 (5.3%)       | 0 (0.0%)       | 2 (1.7%)       |                 |                      |

|                                                     |                |                |                |               |                 |                      |
|-----------------------------------------------------|----------------|----------------|----------------|---------------|-----------------|----------------------|
| 2                                                   | 17<br>(23.9%)  | 3<br>(15.8%)   | 4 (13.8%)      | 24<br>(20.2%) |                 |                      |
| 3                                                   | 13<br>(18.3%)  | 4<br>(21.1%)   | 11<br>(37.9%)  | 28<br>(23.5%) |                 |                      |
| 4                                                   | 40<br>(56.3%)  | 11<br>(57.9%)  | 14<br>(48.3%)  | 65<br>(54.6%) |                 |                      |
| Germline Result                                     |                |                |                |               |                 | 0.026 <sup>2</sup>   |
| Pathogenic                                          | 210<br>(12.4%) | 123<br>(16.8%) | 57<br>(12.2%)  | 7 (7.8%)      | 397 (13.3%)     |                      |
| Benign                                              | 669<br>(39.4%) | 268<br>(36.7%) | 199<br>(42.6%) | 36<br>(40.0%) | 1172<br>(39.3%) |                      |
| VUS                                                 | 818<br>(48.2%) | 339<br>(46.4%) | 211<br>(45.2%) | 47<br>(52.2%) | 1415<br>(47.4%) |                      |
| Family History of cancer in a First Degree Relative |                |                |                |               |                 | < 0.001 <sup>2</sup> |
| Yes                                                 | 596<br>(35.1%) | 262<br>(35.9%) | 131<br>(28.1%) | 30<br>(33.3%) | 1019<br>(34.1%) |                      |
| No                                                  | 261<br>(15.4%) | 141<br>(19.3%) | 68<br>(14.6%)  | 9<br>(10.0%)  | 479 (16.1%)     |                      |
| Pedigree unavailable                                | 840<br>(49.5%) | 327<br>(44.8%) | 268<br>(57.4%) | 51<br>(56.7%) | 1486<br>(49.8%) |                      |
| Primary Cancer                                      |                |                |                |               |                 | < 0.001 <sup>2</sup> |
| BREAST                                              | 145<br>(8.5%)  | 123<br>(16.8%) | 89<br>(19.1%)  | 33<br>(36.7%) | 390 (13.1%)     |                      |
| CNS/BRAIN                                           | 71<br>(4.2%)   | 19<br>(2.6%)   | 29 (6.2%)      | 0 (0.0%)      | 119 (4.0%)      |                      |
| GASTRO-INTESTINAL                                   | 542<br>(31.9%) | 208<br>(28.5%) | 183<br>(39.2%) | 23<br>(25.6%) | 956 (32.0%)     |                      |
| Colorectal                                          | 217<br>(12.8%) | 64<br>(8.8%)   | 82<br>(17.6%)  | 9<br>(10.0%)  | 372 (12.5%)     |                      |
| Pancreas                                            | 132<br>(7.8%)  | 67<br>(9.2%)   | 50<br>(10.7%)  | 9<br>(10.0%)  | 258 (8.6%)      |                      |
| Biliary                                             | 105<br>(6.2%)  | 30<br>(4.1%)   | 21 (4.5%)      | 3 (3.3%)      | 159 (5.3%)      |                      |
| Esophageal/Gastric                                  | 51<br>(3.0%)   | 30<br>(4.1%)   | 18 (3.9%)      | 2 (2.2%)      | 101 (3.4%)      |                      |
| Hepatocellular                                      | 21<br>(1.2%)   | 13<br>(1.8%)   | 9 (1.9%)       | 0 (0.0%)      | 43 (1.4%)       |                      |
| Small bowel                                         | 7 (0.4%)       | 3 (0.4%)       | 2 (0.4%)       | 0 (0.0%)      | 12 (0.4%)       |                      |
| Appendix                                            | 7 (0.4%)       | 1 (0.1%)       | 1 (0.2%)       | 0 (0.0%)      | 9 (0.3%)        |                      |
| Anal                                                | 2 (0.1%)       | 0 (0.0%)       | 0 (0.0%)       | 0 (0.0%)      | 2 (0.1%)        |                      |
| GENITO-URINARY                                      | 425<br>(25.0%) | 152<br>(20.8%) | 19 (4.1%)      | 12<br>(13.3%) | 608 (20.4%)     |                      |
| Prostate                                            | 264<br>(15.6%) | 77<br>(10.5%)  | 7 (1.5%)       | 10<br>(11.1%) | 358 (12.0%)     |                      |

|                         |               |               |               |          |            |  |
|-------------------------|---------------|---------------|---------------|----------|------------|--|
| Renal                   | 87<br>(5.1%)  | 43<br>(5.9%)  | 5 (1.1%)      | 2 (2.2%) | 137 (4.6%) |  |
| Bladder                 | 68<br>(4.0%)  | 32<br>(4.4%)  | 6 (1.3%)      | 0 (0.0%) | 106 (3.6%) |  |
| Testicular              | 5 (0.3%)      | 0 (0.0%)      | 1 (0.2%)      | 0 (0.0%) | 6 (0.2%)   |  |
| Penis                   | 1 (0.1%)      | 0 (0.0%)      | 0 (0.0%)      | 0 (0.0%) | 1 (0.0%)   |  |
| GYNECOLOGICAL           | 107<br>(6.3%) | 73<br>(10.0%) | 38 (8.1%)     | 8 (8.9%) | 226 (7.6%) |  |
| Ovarian                 | 60<br>(3.5%)  | 33<br>(4.5%)  | 29 (6.2%)     | 4 (4.4%) | 126 (4.2%) |  |
| Endometrial             | 45<br>(2.7%)  | 40<br>(5.5%)  | 9 (1.9%)      | 4 (4.4%) | 98 (3.3%)  |  |
| Cervical                | 2 (0.1%)      | 0 (0.0%)      | 0 (0.0%)      | 0 (0.0%) | 2 (0.1%)   |  |
| HEAD/NECK               | 119<br>(7.0%) | 59<br>(8.1%)  | 16 (3.4%)     | 6 (6.7%) | 200 (6.7%) |  |
| THORAX                  | 77<br>(4.5%)  | 31<br>(4.2%)  | 7 (1.5%)      | 5 (5.6%) | 120 (4.0%) |  |
| Thymus                  | 1 (0.1%)      | 0 (0.0%)      | 1 (0.2%)      | 0 (0.0%) | 2 (0.1%)   |  |
| Lung                    | 75<br>(4.4%)  | 30<br>(4.1%)  | 6 (1.3%)      | 5 (5.6%) | 116 (3.9%) |  |
| Mesothelioma            | 1 (0.1%)      | 1 (0.1%)      | 0 (0.0%)      | 0 (0.0%) | 2 (0.1%)   |  |
| SKIN                    | 154<br>(9.1%) | 36<br>(4.9%)  | 54<br>(11.6%) | 3 (3.3%) | 247 (8.3%) |  |
| Melanoma                | 153<br>(9.0%) | 35<br>(4.8%)  | 54<br>(11.6%) | 3 (3.3%) | 245 (8.2%) |  |
| Sebaceous carcinoma     | 1 (0.1%)      | 0 (0.0%)      | 0 (0.0%)      | 0 (0.0%) | 1 (0.0%)   |  |
| Squamous cell carcinoma | 0 (0.0%)      | 1 (0.1%)      | 0 (0.0%)      | 0 (0.0%) | 1 (0.0%)   |  |
| NEUROENDOCRINE (NET)    | 3 (0.2%)      | 0 (0.0%)      | 0 (0.0%)      | 0 (0.0%) | 3 (0.1%)   |  |
| SARCOMA                 | 54<br>(3.2%)  | 29<br>(4.0%)  | 32 (6.9%)     | 0 (0.0%) | 115.9%     |  |

1. Chi-squared test for given probabilities
2. Pearson's Chi-squared test
3. Kruskal-Wallis rank sum test
4. Stage - all cancer types except CNS/Brain tumors
5. WHO Grade - used for CNS/Brain tumors only



**eTable 2: Participant and tumor characteristics by genetic test result**

|                                                                   | Pathogenic  | Benign       | VUS          | Total       | p value              |
|-------------------------------------------------------------------|-------------|--------------|--------------|-------------|----------------------|
| All                                                               | 397 (13.3%) | 1172 (39.3%) | 1415 (47.4%) | 2984        | < 0.001 <sup>2</sup> |
| Enrollment Site                                                   |             |              |              |             | 0.026 <sup>1</sup>   |
| Phoenix, Arizona                                                  | 210 (12.4%) | 669 (39.4%)  | 818 (48.2%)  | 1697        |                      |
| Jacksonville, Florida                                             | 123 (16.8%) | 268 (36.7%)  | 339 (46.4%)  | 730         |                      |
| Rochester, Minnesota                                              | 57 (12.2%)  | 199 (42.6%)  | 211 (45.2%)  | 467         |                      |
| Eau Claire, Wisconsin                                             | 7 (7.8%)    | 36 (40.0%)   | 47 (52.2%)   | 90          |                      |
| Gender                                                            |             |              |              |             | 0.669 <sup>1</sup>   |
| Male                                                              | 213 (13.5%) | 631 (39.9%)  | 738 (46.6%)  | 1582        |                      |
| Female                                                            | 184 (13.1%) | 541 (38.6%)  | 677 (48.3%)  | 1402        |                      |
| Age                                                               |             |              |              |             | 0.086 <sup>3</sup>   |
| Mean (SD)                                                         | 60.0 (13.0) | 61.6 (12.0)  | 61.7 (12.1)  | 61.4 (12.2) |                      |
| Median                                                            | 62.0        | 64.0         | 64.0         | 64.0        |                      |
| Range                                                             | 18.0 - 81.0 | 20.0 - 82.0  | 19.0 - 85.0  | 18.0 - 85.0 |                      |
| Ancestry                                                          |             |              |              |             | 0.008 <sup>1</sup>   |
| White                                                             | 352 (13.7%) | 1033 (40.2%) | 1186 (46.1%) | 2571        |                      |
| Hispanic/Latino                                                   | 15 (9.4%)   | 64 (40.3%)   | 80 (50.3%)   | 159         |                      |
| Black/African American                                            | 14 (12.7%)  | 24 (21.8%)   | 72 (65.5%)   | 110         |                      |
| Asian                                                             | 8 (15.1%)   | 19 (35.8%)   | 26 (49.1%)   | 53          |                      |
| American Indian / Alaskan Native                                  | 3 (10.3%)   | 8 (27.6%)    | 18 (62.1%)   | 29          |                      |
| Native Hawaiian / Pacific Islander                                | 0 (0.0%)    | 1 (16.7%)    | 5 (83.3%)    | 6           |                      |
| Other                                                             | 5 (8.9%)    | 23 (41.1%)   | 28 (50.0%)   | 56          |                      |
| Family History of cancer in a First Degree Relatives <sup>5</sup> |             |              |              |             | 0.288 <sup>1</sup>   |
| Yes                                                               | 146 (14.3%) | 409 (40.1%)  | 464 (45.5%)  | 1019        |                      |
| No                                                                | 70 (14.6%)  | 188 (39.2%)  | 221 (46.1%)  | 479         |                      |
| Stage <sup>4</sup>                                                |             |              |              |             | 0.245 <sup>1</sup>   |
| 0/1                                                               | 62 (11.6%)  | 206 (38.5%)  | 267 (49.9%)  | 535         |                      |
| 2                                                                 | 77 (16.1%)  | 171 (35.8%)  | 229 (48.0%)  | 477         |                      |
| 3                                                                 | 84 (14.2%)  | 234 (39.5%)  | 275 (46.4%)  | 593         |                      |
| 4                                                                 | 159 (12.6%) | 511 (40.7%)  | 587 (46.7%)  | 1257        |                      |
| Missing                                                           | 0           | 0            | 3            | 3           |                      |
| Primary Cancer                                                    |             |              |              |             | 0.155 <sup>1</sup>   |
| BREAST                                                            | 47 (12.1%)  | 160 (41.0%)  | 183 (46.9%)  | 390         |                      |
| CNS/BRAIN                                                         | 15 (12.6%)  | 50 (42.0%)   | 54 (45.4%)   | 119         |                      |
| GASTRO-INTESTINAL                                                 | 147 (15.4%) | 365 (38.2%)  | 444 (46.4%)  | 956         |                      |

|                              |            |             |             |     |  |
|------------------------------|------------|-------------|-------------|-----|--|
| Colorectal                   | 57 (15.3%) | 144 (38.7%) | 171 (46.0%) | 372 |  |
| Pancreas                     | 41 (15.9%) | 103 (39.9%) | 114 (44.2%) | 258 |  |
| Biliary                      | 23 (14.5%) | 66 (41.5%)  | 70 (44.0%)  | 159 |  |
| Esophageal/Gastric           | 15 (14.9%) | 30 (29.7%)  | 56 (55.4%)  | 101 |  |
| Hepatocellular               | 7 (16.3%)  | 14 (32.6%)  | 22 (51.2%)  | 43  |  |
| Small bowel                  | 3 (25.0%)  | 3 (25.0%)   | 6 (50.0%)   | 12  |  |
| Appendix                     | 1 (11.1%)  | 3 (33.3%)   | 5 (55.6%)   | 9   |  |
| Anal                         | 0 (0.0%)   | 2 (100.0%)  | 0 (0.0%)    | 2   |  |
| GENITO-URINARY               | 83 (13.7%) | 230 (37.8%) | 295 (48.5%) | 608 |  |
| Prostate                     | 49 (13.7%) | 147 (41.1%) | 162 (45.3%) | 358 |  |
| Renal                        | 18 (13.1%) | 39 (28.5%)  | 80 (58.4%)  | 137 |  |
| Bladder                      | 15 (14.2%) | 44 (41.5%)  | 47 (44.3%)  | 106 |  |
| Testicular                   | 1 (16.7%)  | 0 (0.0%)    | 5 (83.3%)   | 6   |  |
| Penis                        | 0 (0.0%)   | 0 (0.0%)    | 1 (100.0%)  | 1   |  |
| GYNECOLOGICAL                | 39 (17.3%) | 81 (35.8%)  | 106 (46.9%) | 226 |  |
| Ovarian                      | 26 (20.6%) | 49 (38.9%)  | 51 (40.5%)  | 126 |  |
| Endometrial                  | 13 (13.3%) | 31 (31.6%)  | 54 (55.1%)  | 98  |  |
| Cervical                     | 0 (0.0%)   | 1 (50.0%)   | 1 (50.0%)   | 2   |  |
| HEAD/NECK                    | 21 (10.5%) | 81 (40.5%)  | 98 (49.0%)  | 200 |  |
| THORAX                       | 17 (14.2%) | 39 (32.5%)  | 64 (53.3%)  | 120 |  |
| Thymus                       | 0 (0.0%)   | 2 (100.0%)  | 0 (0.0%)    | 2   |  |
| Lung                         | 17 (14.7%) | 36 (31.0%)  | 63 (54.3%)  | 116 |  |
| Mesothelioma                 | 0 (0.0%)   | 1 (50.0%)   | 1 (50.0%)   | 2   |  |
| SKIN                         | 18 (7.3%)  | 115 (46.6%) | 114 (46.2%) | 247 |  |
| Melanoma                     | 18 (7.3%)  | 115 (46.9%) | 112 (45.7%) | 245 |  |
| Sebaceous carcinoma          | 0 (0.0%)   | 0 (0.0%)    | 1 (100.0%)  | 1   |  |
| Squamous cell carcinoma skin | 0 (0.0%)   | 0 (0.0%)    | 1 (100.0%)  | 1   |  |
| NEUROENDOCRINE (NET)         | 0 (0.0%)   | 2 (66.7%)   | 1 (33.3%)   | 3   |  |
| SARCOMA                      | 10 (8.7%)  | 49 (42.6%)  | 56 (48.7%)  | 115 |  |

1. Pearson's Chi-squared test
2. Chi-squared test for given probabilities
3. Kruskal-Wallis rank sum test
4. Stage - all cancer types except CNS/Brain tumors
5. Limited to patients with a pedigree available (N=1498)

**eTable 3: Incidence of findings not predicted by clinical guidelines (incremental findings)**

|                                                  | 2018 (N=397) | 2020 (N=397) | p value |
|--------------------------------------------------|--------------|--------------|---------|
| Did they meet NCCN/NSGC/ACMG testing guidelines? |              |              | 0.101   |
| Yes                                              | 205 (51.6%)  | 228 (57.4%)  |         |
| NCCN                                             | 186 (46.8%)  | 212 (53.4%)  |         |
| NSGC/ACMG                                        | 147 (37.0%)  | 148 (37.3%)  |         |
| No                                               | 192 (48.4%)  | 169 (42.6%)  |         |

**eTable 4: Participant and tumor characteristics by incremental vs non-incremental PGM**

|                                                                 | Non-Incremental PGM (N=228) | Incremental PGM (N=169) | Total (N=397) | p value              |
|-----------------------------------------------------------------|-----------------------------|-------------------------|---------------|----------------------|
| Enrollment Site                                                 |                             |                         |               | 0.530 <sup>1</sup>   |
| ARZ                                                             | 117 (51.3%)                 | 93 (55.0%)              | 210 (52.9%)   |                      |
| FLA                                                             | 69 (30.3%)                  | 54 (32.0%)              | 123 (31.0%)   |                      |
| RST                                                             | 37 (16.2%)                  | 20 (11.8%)              | 57 (14.4%)    |                      |
| EU                                                              | 5 (2.2%)                    | 2 (1.2%)                | 7 (1.8%)      |                      |
| Gender                                                          |                             |                         |               | 0.012 <sup>1</sup>   |
| Male                                                            | 110 (48.2%)                 | 103 (60.9%)             | 213 (53.7%)   |                      |
| Female                                                          | 118 (51.8%)                 | 66 (39.1%)              | 184 (46.3%)   |                      |
| Age                                                             |                             |                         |               | < 0.001 <sup>1</sup> |
| Median (SD)                                                     | 57.6 (14.0)                 | 63.1 (10.9)             | 60.0 (13.0)   |                      |
| Age < 50 Years                                                  | 68 (29.8%)                  | 17 (10.1%)              | 85 (21.4%)    |                      |
| Age ≥ 50 Years                                                  | 160 (70.2%)                 | 152 (89.9%)             | 312 (78.6%)   |                      |
| Ancestry                                                        |                             |                         |               | 0.049 <sup>1</sup>   |
| White                                                           | 196 (86.0%)                 | 156 (92.3%)             | 352 (88.7%)   |                      |
| Non-white                                                       | 32 (14.0%)                  | 13 (7.7%)               | 45 (11.3%)    |                      |
| Family History of cancer in First Degree Relatives <sup>2</sup> |                             |                         |               | 0.362 <sup>1</sup>   |
| Yes                                                             | 88 (38.6%)                  | 58 (34.3%)              | 146 (36.8%)   |                      |
| No                                                              | 43 (18.9%)                  | 27 (16.0%)              | 70 (17.6%)    |                      |
| Lynch MMR Genes                                                 |                             |                         |               | 0.004 <sup>1</sup>   |
| Yes                                                             | 24 (10.5%)                  | 5 (3.0%)                | 29 (7.3%)     |                      |
| No                                                              | 204 (89.5%)                 | 164 (97.0%)             | 368 (92.7%)   |                      |
| BRCA 1 and 2 Genes                                              |                             |                         |               | < 0.001 <sup>1</sup> |
| Yes                                                             | 56 (24.6%)                  | 10 (5.9%)               | 66 (16.6%)    |                      |
| No                                                              | 172 (75.4%)                 | 159 (94.1%)             | 331 (83.4%)   |                      |
| Primary Cancer                                                  |                             |                         |               | < 0.001 <sup>1</sup> |
| Breast                                                          | 38 (16.7%)                  | 9 (5.3%)                | 47 (11.8%)    |                      |
| CNS/Brain                                                       | 3 (1.3%)                    | 12 (7.1%)               | 15 (3.8%)     |                      |
| GI                                                              | 95 (41.7%)                  | 52 (30.8%)              | 147 (37.0%)   |                      |
| GU                                                              | 49 (21.5%)                  | 34 (20.1%)              | 83 (20.9%)    |                      |
| GYN                                                             | 37 (16.2%)                  | 2 (1.2%)                | 39 (9.8%)     |                      |
| Head/neck                                                       | 1 (0.4%)                    | 20 (11.8%)              | 21 (5.3%)     |                      |
| Sarcoma                                                         | 3 (1.3%)                    | 7 (4.1%)                | 10 (2.5%)     |                      |
| Skin                                                            | 2 (0.9%)                    | 16 (9.5%)               | 18 (4.5%)     |                      |
| Thorax                                                          | 0 (0.0%)                    | 17 (10.1%)              | 17 (4.3%)     |                      |
| Cancer Stage                                                    |                             |                         |               | 0.403 <sup>1</sup>   |

|                   |             |            |             |  |
|-------------------|-------------|------------|-------------|--|
| Early Stage (0-2) | 78 (34.7%)  | 61 (38.9%) | 139 (36.4%) |  |
| Late Stage (3-4)  | 147 (65.3%) | 96 (61.1%) | 243 (63.6%) |  |
| Missing           | 3           | 12         | 15          |  |

1. Pearson's Chi-squared test
2. Limited to patients with a pedigree available (N=1498)

**eTable 5: Clinical Implications of those with high penetrance PGM**

| Patient | Age | Gender | Cancer Type | PGM                | Clinical Action  | Description                                                                      |
|---------|-----|--------|-------------|--------------------|------------------|----------------------------------------------------------------------------------|
| 1       | 36  | Female | Breast      | <i>BRCA1</i>       | Surgery          | Bilateral nipple-sparing mastectomy plus Bilateral salpingo-oophorectomy         |
| 2       | 54  | Male   | Prostate    | <i>BRCA2</i>       | Targeted Therapy | Olaparib (PARPi)                                                                 |
| 3       | 57  | Male   | Prostate    | <i>BRCA2</i>       | Clinical Trial   | Rucaparib (PARPi) NCT02975934                                                    |
| 4       | 44  | Male   | Colorectal  | <i>MSH2</i>        | Targeted Therapy | Pembrolizumab                                                                    |
| 5       | 67  | Female | Ovarian     | <i>BRCA1</i>       | Surgery          | Bilateral prophylactic mastectomy                                                |
| 6       | 32  | Female | Breast      | <i>BRCA1</i>       | Surgery          | Bilateral mastectomy                                                             |
| 7       | 78  | Male   | Breast      | <i>BRCA2</i>       | Surgery          | Bilateral total mastectomy                                                       |
| 8       | 58  | Female | Breast      | <i>BRCA2</i>       | Surgery          | Bilateral mastectomy                                                             |
| 9       | 70  | Female | Ovarian     | <i>BRCA1</i>       | Targeted Therapy | Olaparib (PARPi)                                                                 |
| 10      | 62  | Female | Ovarian     | <i>BRCA2, SDHA</i> | Targeted Therapy | Olaparib (PARPi)                                                                 |
| 11      | 44  | Female | Ovarian     | <i>BRCA1</i>       | Targeted Therapy | Olaparib                                                                         |
| 12      | 54  | Female | Ovarian     | <i>BRCA1</i>       | Targeted Therapy | Rucaparib (PARPi)                                                                |
| 13      | 33  | Female | Colorectal  | <i>APC</i>         | Surgery          | Total colectomy                                                                  |
| 14      | 70  | Female | Pancreas    | <i>PALB2</i>       | Targeted Therapy | Platinum-based therapy                                                           |
| 15      | 73  | Female | Biliary     | <i>BRCA2</i>       | Surgery          | Bilateral mastectomy and Bilateral salpingo-oophorectomy plus total hysterectomy |
| 16      | 66  | Female | Biliary     | <i>BRCA1</i>       | Surgery          | Bilateral mastectomy                                                             |
| 17      | 44  | Female | Endometrial | <i>BRCA1</i>       | Targeted Therapy | Olaparib (PARPi)                                                                 |
| 18      | 40  | Female | Colorectal  | <i>MSH6</i>        | Targeted Therapy | Nivolumab + Ipilimumab                                                           |
| 19      | 65  | Male   | Pancreas    | <i>MSH6</i>        | Targeted Therapy | Pembrolizumab                                                                    |
| 20      | 72  | Female | Ovarian     | <i>BRCA2</i>       | Surgery          | Bilateral mastectomy + Bilateral salpingo-oophorectomy                           |
| 21      | 52  | Female | Ovarian     | <i>BRCA2</i>       | Targeted Therapy | Olaparib (PARPi)                                                                 |
| 22      | 48  | Female | Breast      | <i>BRCA2</i>       | Surgery          | Bilateral mastectomy + Bilateral salpingo-oophorectomy                           |
| 23      | 31  | Female | Breast      | <i>BRCA1</i>       | Surgery          | Bilateral mastectomy + Bilateral salpingo-oophorectomy                           |
| 24      | 52  | Female | Breast      | <i>CDH1</i>        | Surgery          | Bilateral mastectomy                                                             |
| 25      | 52  | Female | Breast      | <i>BRCA2</i>       | Surgery          | Bilateral mastectomy + Bilateral salpingo-oophorectomy                           |
| 26      | 38  | Female | Breast      | <i>BRCA1</i>       | Surgery          | Bilateral mastectomy                                                             |
| 27      | 37  | Female | Breast      | <i>BRCA2, SDHD</i> | Surgery          | Bilateral mastectomy                                                             |
| 28      | 54  | Female | Breast      | <i>BRCA1</i>       | Surgery          | Bilateral mastectomy                                                             |
| 29      | 32  | Male   | Head/Neck   | <i>RET</i>         | Clinical Trial   | RET inhibitor NCT03037385                                                        |
| 30      | 50  | Female | Ovarian     | <i>BRCA1</i>       | Targeted Therapy | Olaparib (PARPi)                                                                 |
| 31      | 48  | Male   | Colorectal  | <i>PMS2</i>        | Targeted Therapy | Nivolumab + Ipilimumab                                                           |
| 32      | 66  | Male   | Prostate    | <i>BRCA2</i>       | Targeted Therapy | Olaparib (PARPi)                                                                 |
| 33      | 67  | Female | Biliary     | <i>MLH1</i>        | Targeted Therapy | Pembrolizumab                                                                    |

|    |    |        |                        |              |                  |                                                        |
|----|----|--------|------------------------|--------------|------------------|--------------------------------------------------------|
| 34 | 44 | Female | Breast                 | <i>BRCA1</i> | Surgery          | Bilateral mastectomy                                   |
| 35 | 68 | Male   | Pancreas               | <i>BRCA2</i> | Targeted Therapy | Olaparib (PARPi)                                       |
| 36 | 52 | Male   | Colorectal             | <i>MSH2</i>  | Targeted Therapy | Pembrolizumab, Nivolumab, Ipilimumab                   |
| 37 | 57 | Female | Ovarian                | <i>BRCA1</i> | Surgery          | Bilateral mastectomy + Bilateral salpingo-oophorectomy |
| 38 | 55 | Female | Pancreas               | <i>BRCA2</i> | Targeted Therapy | Rucaparib (PARPi)                                      |
| 39 | 54 | Female | Ovarian                | <i>BRCA2</i> | Targeted Therapy | Niraparib, Olaparib (PARPi)                            |
| 40 | 18 | Male   | Esophageal/<br>Gastric | <i>SDHA</i>  | Other            | No adjuvant treatment required                         |
| 41 | 53 | Female | Ovarian                | <i>BRCA1</i> | Targeted Therapy | Olaparib (PARPi)                                       |
| 42 | 72 | Female | Ovarian                | <i>PALB2</i> | Targeted Therapy | Olaparib (PARPi)                                       |

**eTable 6: Characteristics of participants whose families did or did not undergo cascade family variant testing**

|                                  | Did not undergo FVT<br>(N=327) | Underwent FVT<br>(N=70) | Total<br>(N=397) | p value            |
|----------------------------------|--------------------------------|-------------------------|------------------|--------------------|
| Gender                           |                                |                         |                  | 0.907 <sup>1</sup> |
| Male                             | 175 (53.5%)                    | 38 (54.3%)              | 213 (53.7%)      |                    |
| Female                           | 152 (46.5%)                    | 32 (45.7%)              | 184 (46.3%)      |                    |
| Age                              |                                |                         |                  | 0.294 <sup>2</sup> |
| Mean (SD)                        | 60.2 (13.1)                    | 58.8 (12.8)             | 60.0 (13.0)      |                    |
| Median                           | 62.0                           | 61.0                    | 62.0             |                    |
| Range                            | 24.0 - 81.0                    | 18.0 - 78.0             | 18.0 - 81.0      |                    |
| Ancestry                         |                                |                         |                  | 0.462 <sup>1</sup> |
| White                            | 285 (87.2%)                    | 67 (95.7%)              | 352 (88.7%)      |                    |
| Hispanic/Latino                  | 14 (4.3%)                      | 1 (1.4%)                | 15 (3.8%)        |                    |
| Black/African American           | 13 (4.0%)                      | 1 (1.4%)                | 14 (3.5%)        |                    |
| Asian                            | 7 (2.1%)                       | 1 (1.4%)                | 8 (2.0%)         |                    |
| American Indian / Alaskan Native | 3 (0.9%)                       | 0 (0.0%)                | 3 (0.8%)         |                    |
| Other                            | 5 (1.5%)                       | 0 (0.0%)                | 5 (1.3%)         |                    |
| Cancer Stage                     |                                |                         |                  | 0.102 <sup>1</sup> |
| 0/1                              | 46 (14.6%)                     | 16 (23.9%)              | 62 (16.2%)       |                    |
| 2                                | 60 (19.0%)                     | 17 (25.4%)              | 77 (20.2%)       |                    |
| 3                                | 73 (23.2%)                     | 11 (16.4%)              | 84 (22.0%)       |                    |
| 4                                | 136 (43.2%)                    | 23 (34.3%)              | 159 (41.6%)      |                    |
| Number of family members tested  |                                |                         |                  |                    |
| Mean (SD)                        | NA                             | 2.6 (2.2)               | 2.6 (2.2)        |                    |
| Median                           | NA                             | 2.0                     | 2.0              |                    |
| Range                            | NA                             | 1.0 - 14.0              | 1.0 - 14.0       |                    |
| <i>BRCA 1 and 2 genes</i>        |                                |                         |                  | 0.234 <sup>1</sup> |
| Yes                              | 51 (15.6%)                     | 15 (21.4%)              | 66 (16.6%)       |                    |
| No                               | 276 (84.4%)                    | 55 (78.6%)              | 331 (83.4%)      |                    |
| Lynch MMR genes                  |                                |                         |                  | 0.654 <sup>1</sup> |
| Yes                              | 23 (7.0%)                      | 6 (8.6%)                | 29 (7.3%)        |                    |
| No                               | 304 (93.0%)                    | 64 (91.4%)              | 368 (92.7%)      |                    |

1. Pearson's Chi-squared test
2. Kruskal-Wallis rank sum test



**eTable 7: Logistic regression ORs and 95% CI of patient and tumor predictors of pathogenic/likely pathogenic mutation**

| Characteristic                                    | OR        | 95% CI    | P     |
|---------------------------------------------------|-----------|-----------|-------|
| Age group, y                                      |           |           |       |
| ≥50                                               | 1.0 (ref) |           |       |
| <50                                               | 1.38      | 1.06-1.78 | 0.016 |
| Sex                                               |           |           |       |
| Male                                              | 1.0 (ref) |           |       |
| Female                                            | 0.97      | 0.79-1.20 | 0.785 |
| Cancer stage                                      |           |           |       |
| Stage 0/1                                         | 1.0 (ref) |           |       |
| Stage 2                                           | 1.44      | 1.00-2.07 | 0.050 |
| Stage 3                                           | 1.23      | 0.87-1.76 | 0.244 |
| Stage 4                                           | 1.08      | 0.79-1.49 | 0.624 |
| Dichotomize Cancer Stage                          |           |           |       |
| Early (stage 0-2)                                 | 1.0 (ref) |           |       |
| Advanced (stage 3-4)                              | 0.95      | 0.76-1.19 | 0.652 |
| Family history of cancer in first degree relative |           |           |       |
| No                                                | 1.0 (ref) |           |       |
| Yes                                               | 0.98      | 0.72-1.34 | 0.88  |
| Cancer Type                                       |           |           |       |
| Breast                                            | 1.0 (ref) | --        | --    |
| Colorectal                                        | 1.32      | 0.88-2.0  | 0.189 |
| Pancreas-biliary                                  | 1.38      | 0.88-2.17 | 0.164 |
| Prostate                                          | 1.16      | 0.75-1.78 | 0.504 |
| Melanoma                                          | 0.58      | 0.32-1.00 | 0.049 |

## eReferences:

1. Beitsch PD, Whitworth PW, Hughes K, et al. Underdiagnosis of Hereditary Breast Cancer: Are Genetic Testing Guidelines a Tool or an Obstacle? *J Clin Oncol* 2019;37:453-460.
2. Lincoln SE, Kobayashi Y, Anderson MJ, et al. A Systematic Comparison of Traditional and Multigene Panel Testing for Hereditary Breast and Ovarian Cancer Genes in More Than 1000 Patients. *J Mol Diagn* 2015;17:533-44.
3. Truty R, Paul J, Kennemer M, et al. Prevalence and properties of intragenic copy-number variation in Mendelian disease genes. *Genet Med* 2019;21:114-123.
4. Nord AS, Lee M, King MC, et al. Accurate and exact CNV identification from targeted high-throughput sequence data. *BMC Genomics* 2011;12:184.
5. Kurian AW, Hare EE, Mills MA, et al. Clinical evaluation of a multiple-gene sequencing panel for hereditary cancer risk assessment. *J Clin Oncol* 2014;32:2001-9.
6. Hogervorst FB, Nederlof PM, Gille JJ, et al. Large genomic deletions and duplications in the BRCA1 gene identified by a novel quantitative method. *Cancer Res* 2003;63:1449-53.
7. Nykamp K, Anderson M, Powers M, et al. Sherlock: a comprehensive refinement of the ACMG-AMP variant classification criteria. *Genet Med* 2017;19:1105-1117.
8. Ford D, Easton DF, Stratton M, et al. Genetic heterogeneity and penetrance analysis of the BRCA1 and BRCA2 genes in breast cancer families. The Breast Cancer Linkage Consortium. *Am J Hum Genet* 1998;62:676-89.
9. Cybulski C, Wokolorczyk D, Jakubowska A, et al. Risk of breast cancer in women with a CHEK2 mutation with and without a family history of breast cancer. *J Clin Oncol* 2011;29:3747-52.
10. Wood ME, McKinnon W, Garber J. Risk for breast cancer and management of unaffected individuals with non-BRCA hereditary breast cancer. *Breast J* 2020.
11. Lauper JM, Krause A, Vaughan TL, et al. Spectrum and risk of neoplasia in Werner syndrome: a systematic review. *PLoS One* 2013;8:e59709.
12. Leshno A, Shapira S, Liberman E, et al. The APC I1307K allele conveys a significant increased risk for cancer. *Int J Cancer* 2016;138:1361-7.
